# Supplementary material for: Rational synthesis of a hierarchical Mo2C/C nanosheet composite with enhanced lithium storage properties
Source: Royal Society of Chemistry journal article supplement (doi:10.1039/d1ra03822b), 2021-01-01
Supplement: d1ra03822b1.pdf [file d1ra03822b1.pdf]

# Rational synthesis of hierarchical Mo<sub>2</sub>C/C nanosheet composite with enhanced lithium storage properties

*Xin Yue, Minglei Cao\*, Limeng Wu, Wei Chen, Xingxing Li, Yanan Ma, Chuankun*

*Zhang\**

School of Sciences, Hubei University of Automotive Technology, Shiyan 442002, P.  
R. China.

\* Corresponding authors: Minglei Cao, [cml07114052@163.com](mailto:cml07114052@163.com); Chuankun Zhang,  
[zhangchk\\_lx@huat.edu.cn](mailto:zhangchk_lx@huat.edu.cn)

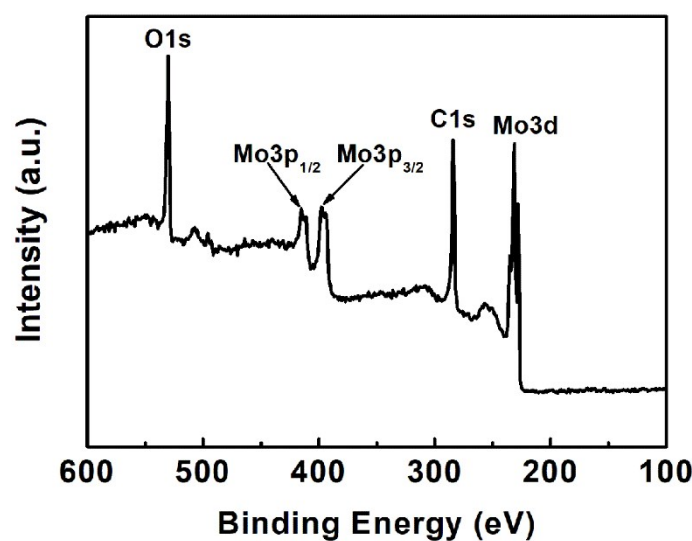

Fig. S1 XPS survey spectrum of Mo<sub>2</sub>C/C-2.

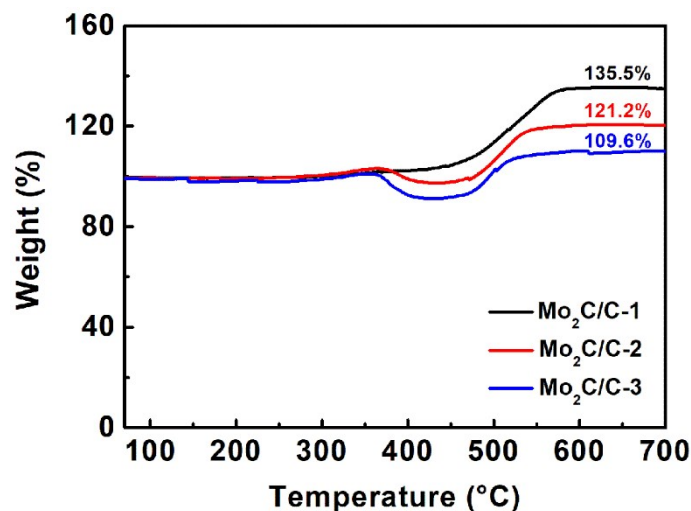

Fig. S2 TGA curves of various Mo<sub>2</sub>C/C nanosheet composites in air.

From the TGA curves, the carbon contents can be calculated using Formula S1:

$$w(C) = 1 - \frac{w(re) \times M(Mo_2C)}{2M(MoO_3)} = 1 - \frac{w(re) \times 204}{2 \times 144} = 1 - 0.71w(re)$$

(S1)

where  $w(C)$  and  $w(re)$  represent the weight percentages of the carbon component and the residue, respectively;  $M(Mo_2C)$  and  $M(MoO_3)$  stand for the molecular weights of Mo<sub>2</sub>C and MoO<sub>3</sub>, respectively.

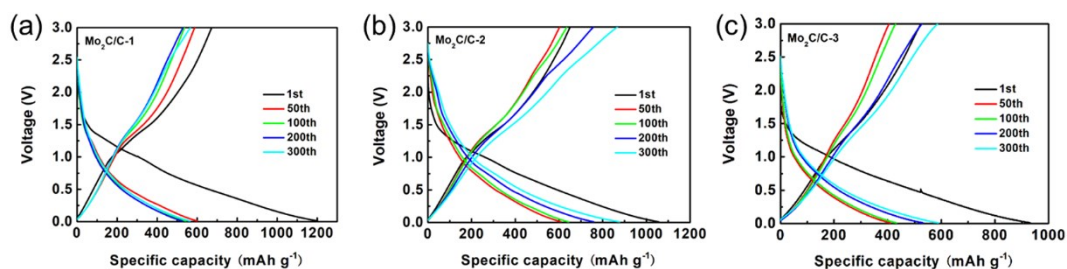

Fig. S3 The galvanostatic charge/discharge curves of (a) Mo<sub>2</sub>C/C-1, (b) Mo<sub>2</sub>C/C-2, and (c) Mo<sub>2</sub>C/C-3 at different cycles.

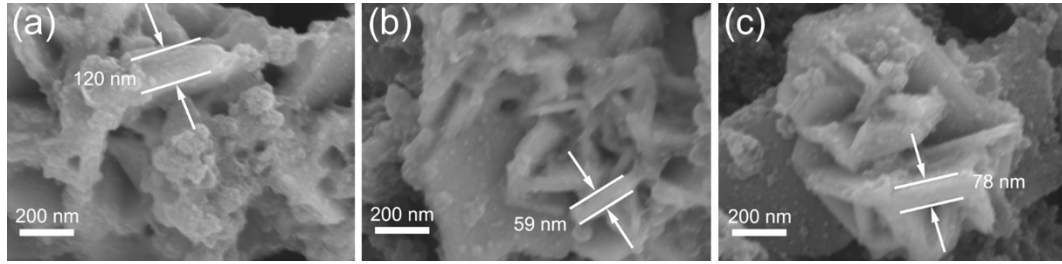

Fig. S4 SEM images of (a) Mo<sub>2</sub>C/C-1, (b) Mo<sub>2</sub>C/C-2, and (c) Mo<sub>2</sub>C/C-3 after 300 cycles at the current density of 0.2 A g<sup>-1</sup>.

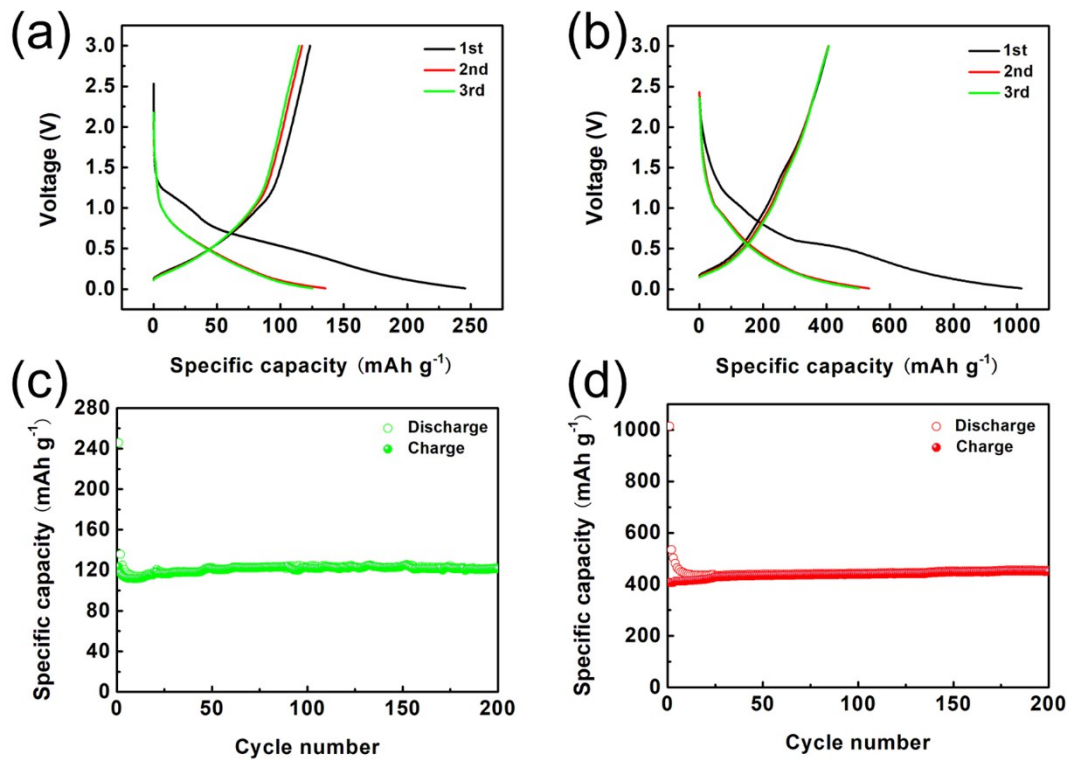

Fig. S5 The initial three charge/discharge curves of (a) p-C and (b) Mo<sub>2</sub>C/C-4; Cycling performances of (c) p-C and (d) Mo<sub>2</sub>C/C-4 at 0.2 A g<sup>-1</sup>.

Table S1. Comparison of the cycling performance of hierarchical Mo<sub>2</sub>C/C nanosheet composite with the published reports on Mo<sub>2</sub>C-based materials.

| Types of Mo <sub>2</sub> C-based material                 | Current densities (A g <sup>-1</sup> ) | Cycle numbers | Capacity retention efficiencies (%) | References       |
|-----------------------------------------------------------|----------------------------------------|---------------|-------------------------------------|------------------|
| MoO <sub>2</sub> -Mo <sub>2</sub> C-C composite           | 2.0                                    | 70            | 56.0                                | 15               |
| Mo <sub>2</sub> C/N-doped carbon heteronanowires          | 2.0                                    | 700           | 98.4                                | 17               |
| N, P co-doped Mo <sub>2</sub> C/C nanosheets              | 0.15                                   | 200           | 86.9                                | 18               |
| 3D Mo <sub>2</sub> C@C-graphene aerogel                   | 1.0                                    | 200           | 90.5                                | 19               |
| Hollow Mo <sub>2</sub> C@C core-shell nanofibers          | 1.0                                    | 300           | 92.7                                | 24               |
| MoO <sub>2</sub> /Mo <sub>2</sub> C/C hybrid nanowires    | 2.0                                    | 500           | 145.0                               | 27               |
| MoO <sub>2</sub> -Mo <sub>2</sub> C-C microspheres        | 1.0                                    | 500           | 80.0                                | 28               |
| Mo <sub>2</sub> C@onion-like carbon nanocomposites        | 0.5                                    | 100           | 91.7                                | 29               |
| <b>Hierarchical Mo<sub>2</sub>C/C nanosheet composite</b> | <b>5.0</b>                             | <b>5000</b>   | <b>122.1</b>                        | <b>This work</b> |

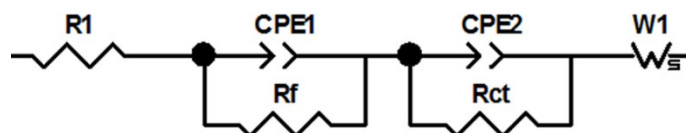

Fig. S6 The equivalent circuit of impedance spectra of Mo<sub>2</sub>C/C nanosheet composites.

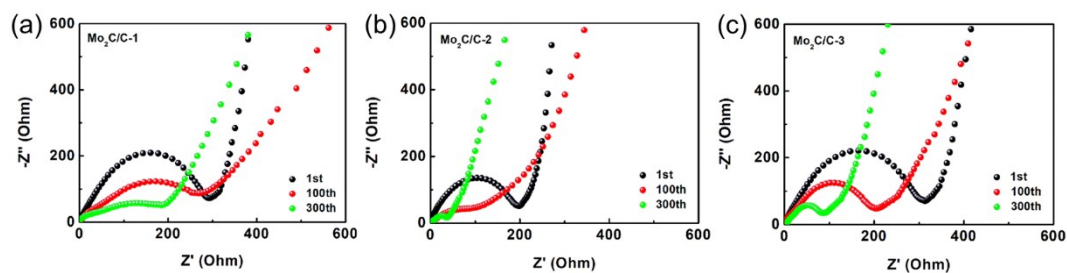

Fig. S7 Nyquist plots of (a) Mo<sub>2</sub>C/C-1, (b) Mo<sub>2</sub>C/C-2, and (c) Mo<sub>2</sub>C/C-3 during cycling test.
